# Supplementary material for: Microbial Communities of Deep-Sea Methane Seeps at Hikurangi Continental Margin (New Zealand)
Source: PubMed Central journal article supplement (PMC3787109; doi:10.1371/journal.pone.0072627), 2013-09-30
Supplement: pone.0072627.s004.pdf [file pone.0072627.s004.pdf]

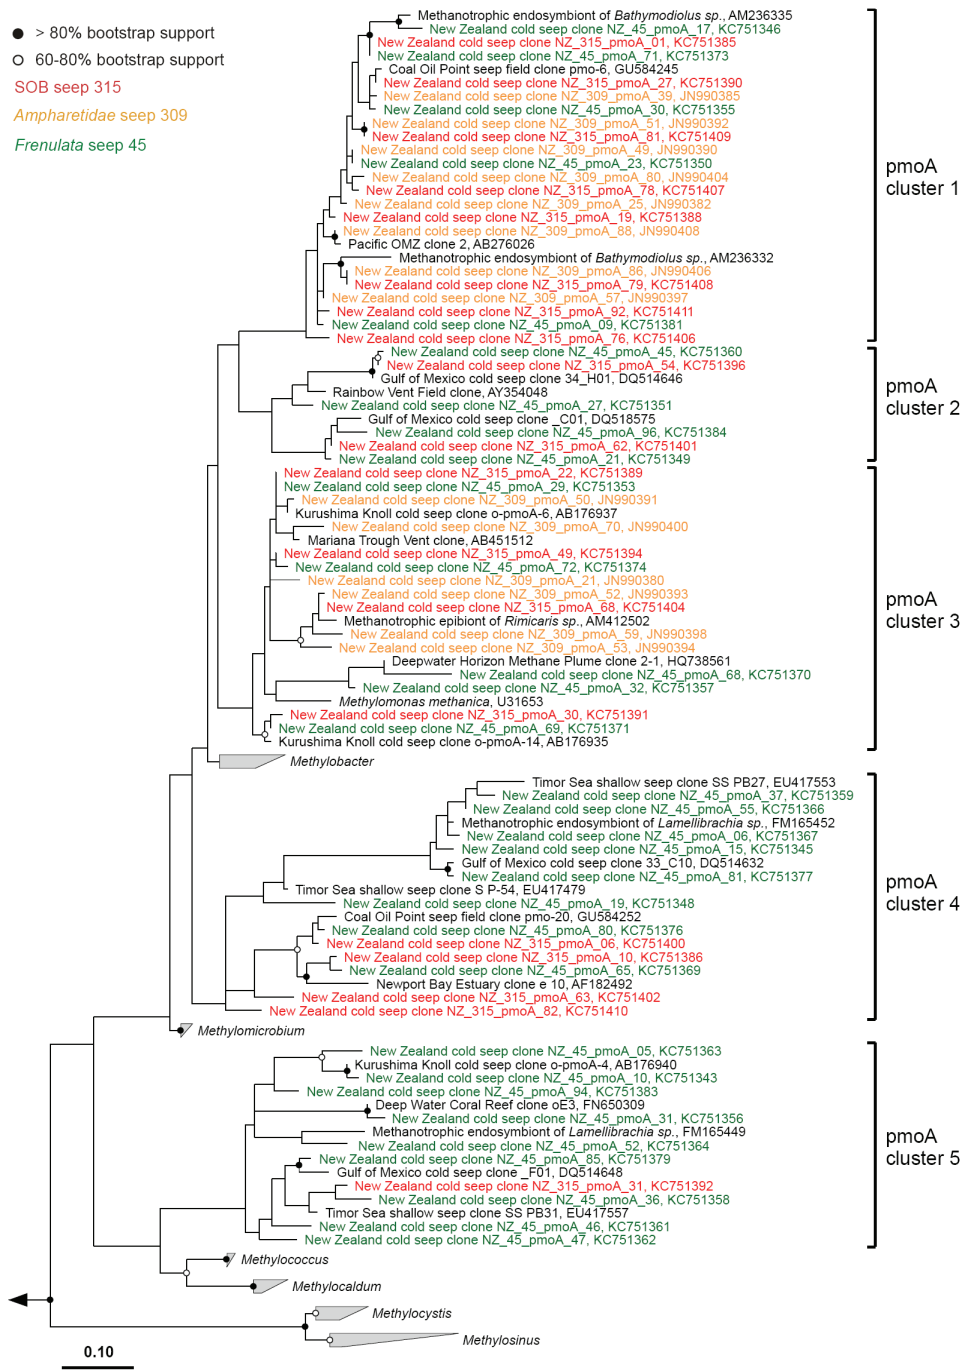

**Figure S4: Phylogeny of *pmoA* protein**

Phylogeny of the *pmoA* protein at the frenulate site 45, the ampharetid site 309 and the SOB site 315. The tree was calculated using 98 non-redundant, curated amino acid sequences, from the three habitats and 90 reference sequences. We used a maximum likelihood algorithm employing 100 bootstraps and a positional variability filter, excluding the highly variable regions. Bar = 10% estimated sequence divergence.
