# Supplementary material for: Microbial Communities of Deep-Sea Methane Seeps at Hikurangi Continental Margin (New Zealand)
Source: PubMed Central journal article supplement (PMC3787109; doi:10.1371/journal.pone.0072627), 2013-09-30
Supplement: pone.0072627.s005.pdf [file pone.0072627.s005.pdf]

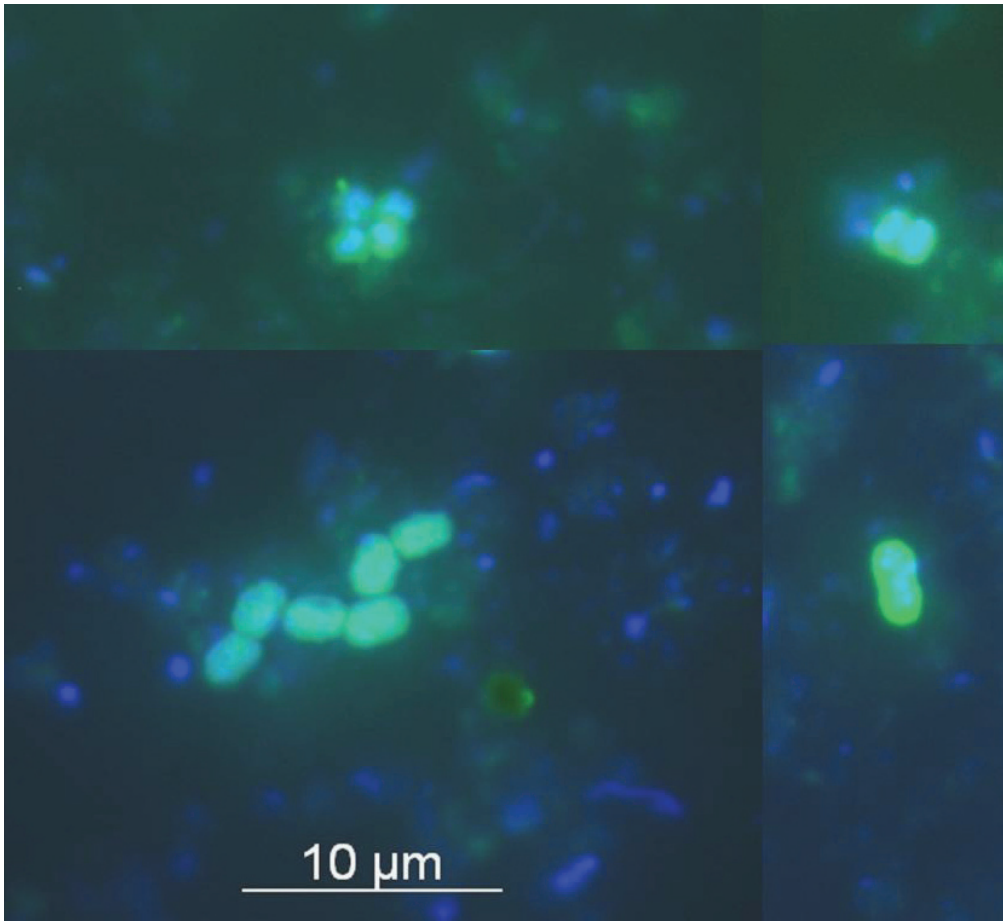

**Figure S5: Micrographs of organisms related to *Bathymodiolus* spp. endosymbionts**

Micrographs of MMG1 organisms in surface sediment of the ampharetid habitat (site 309). The cells were stained by the nucleic acid stain DAPI (blue) and a probe that detects the methanotrophic endosymbionts of *Bathymodiolus* spp. and other MMG1 bacteria (probe BMARm-345 - green).
