# Supplementary material for: Microbial Communities of Deep-Sea Methane Seeps at Hikurangi Continental Margin (New Zealand)
Source: PubMed Central journal article supplement (PMC3787109; doi:10.1371/journal.pone.0072627), 2013-09-30
Supplement: pone.0072627.s009.pdf [file pone.0072627.s009.pdf]

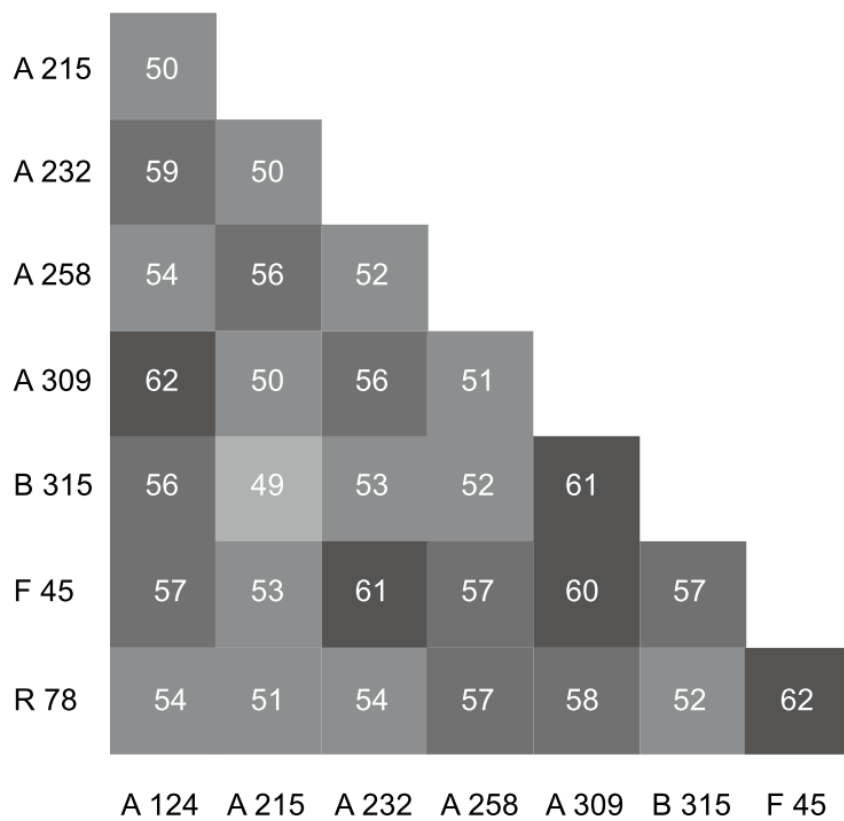

**Figure S9: Shared operational taxonomic units between sites**

Percentage of operational taxonomic units (OTUs) that are shared between the investigated sites. The letter in front of the station number indicates the habitat type (A = *Ampharetidae*, B = SOB, F = *Frenulata*, R = Reference).
