# Supplementary material for: Microbial Communities of Deep-Sea Methane Seeps at Hikurangi Continental Margin (New Zealand)
Source: PubMed Central journal article supplement (PMC3787109; doi:10.1371/journal.pone.0072627), 2013-09-30
Supplement: pone.0072627.s013.pdf [file pone.0072627.s013.pdf]

Table S1: Total cell counts and relative abundance of methanotrophs at Hikurangi margin, Hydrate Ridge, Black Sea and Håkon Mosby mud volcano seep sites

|                                                         | Total Cells<br>(10 <sup>10</sup> cm <sup>3</sup> ) | <i>Methylococcales</i> | ANME-1 | ANME-2a/DSS<br>Consortia | ANME-2c/DSS<br>Consortia | ANME-3/DBB<br>Consortia |
|---------------------------------------------------------|----------------------------------------------------|------------------------|--------|--------------------------|--------------------------|-------------------------|
| Hikurangi<br><i>Ampharetidae</i> (124)                  | 0.15                                               | +++                    | -      | +++                      | +                        | n.a.#                   |
| Hikurangi<br><i>Ampharetidae</i> (309)                  | 0.2                                                | +++                    | -      | ++                       | ++                       | n.a.#                   |
| Hikurangi<br><i>Frenulata</i> (45)                      | 0.13                                               | +                      | -      | +                        | -                        | +                       |
| Hikurangi<br>SOB (315)                                  | 1                                                  | +                      | -      | +++                      | +                        | n.a.#                   |
| Hydrate Ridge<br><i>Beggiatoa</i> site                  | 4.2                                                | n.a.                   | +      | +++                      | +                        | -                       |
| Hydrate Ridge<br><i>Calyptogena</i> site                | 4.6                                                | n.a.                   | +      | +                        | +++                      | -                       |
| Black Sea<br>sediment P817                              | 2.7                                                | n.a.                   | +      | + ##                     | + ##                     | -                       |
| Black Sea P822<br>microbial mat,<br>top part of chimney | 30                                                 | n.a.                   | +      | +++                      | +                        | -                       |
| Black Sea P822<br>microbial mat,<br>inside of chimney   | 1.4                                                | n.a.                   | +++    | +                        | +                        | -                       |
| HMMV<br><i>Beggiatoa</i> site                           | 1.9                                                | +                      | -      | - ##                     | - ##                     | +++                     |
| HMMV<br>tubeworm site                                   | 0.33                                               | -                      | +      | ++ ##                    | ++ ##                    | ++                      |

+present in low proportions ++high proportions +++dominant type n.a.: not assessed #present as 16S rRNA gene ## ANME-2/DSS

#### References:

- Knittel et al. (2005) Diversity and Distribution of Methanotrophic Archaea at Cold Seeps. *Appl Environ Microbiol* 71: 467-479.  
 Niemann et al. (2006) Novel microbial communities of the Haakon Mosby mud volcano and their role as a methane sink. *Nature* 443: 854-858.  
 Lösekann et al. (2007) Diversity and Abundance of Aerobic and Anaerobic Methane Oxidizers at the Haakon Mosby Mud Volcano, Barents Sea. *Appl Environ Microbiol* 73: 3348-3362.  
 Schreiber et al. (2010) Identification of the dominant sulfate-reducing bacterial partner of anaerobic methanotrophs of the ANME-2 clade. *Environ Microbiol* 12: 2327-2340.28.  
 Arnds (2009) Molecular characterization of microbial populations in methane-rich marine habitats. Bremen: Universität Bremen. 158 p.  
 Knittel et al. (2003) Activity, distribution, and diversity of sulfate reducers and other bacteria in sediments above gas hydrate (Cascadia Margin, Oregon). *Geomicrobiol J* 20: 269-294.
