# Supplementary material for: Microbial Communities of Deep-Sea Methane Seeps at Hikurangi Continental Margin (New Zealand)
Source: PubMed Central journal article supplement (PMC3787109; doi:10.1371/journal.pone.0072627), 2013-09-30
Supplement: pone.0072627.s014.pdf [file pone.0072627.s014.pdf]

## Supporting Material and Methods

### ARISA

ARISA was carried out according to Böer and colleagues [1] with the following modifications. Polymerase chain reactions (PCRs) (50 µl total volume) were conducted in triplicates containing 1× PCR buffer, 0.25 mM dNTP mix, 0.09 mg ml<sup>-1</sup> bovine serum albumin, 400 nM each of universal primer ITSF (Table S1), labeled with phosphoramidite dye FAM and bacterial ITSReub (Table S1), 0.05 units MasterTaq polymerase and 20-25 ng environmental DNA. PCR was carried out in an Eppendorf MasterCycler with an initial denaturation for 3 min at 94°C, followed by 30 cycles of 94°C for 45 sec, 55°C for 45 sec, 72°C for 90 sec and a final extension for 5 min at 72°C. PCR products were purified utilizing Sephadex G-50 Superfine, which is based on the principle of gel filtration by cross-linked dextran molecules. Sephadex was filled in the wells of a Multiscreen HV plate and soaked in 300 µl of HPLC-grade water per well for 3 h at RT, excess water was removed using an Eppendorf Centrifuge 5810R (910 × g for 5 min at RT), the wells were washed with 150 µl HPLC water and again centrifuged (as above). PCR products were loaded in the center of each well, centrifuged (as above) and collected in a sterile 96-well plate. A standardized amount of amplified DNA (100 ng) was mixed with a separation cocktail containing 0.5 µl (when <3 µl PCR products were used) or 1 µl (when ≥3 µl PCR products were used) of internal size standard Map Marker 1000 ROX (50-1000 bp), 0.5 µl tracking dye and 14 µl of deionized Hi-Di formamide. Discrimination of the PCR-amplified fragments via capillary electrophoresis was carried out on an ABI PRISM 3130xl Genetic Analyzer (Applied Biosystems) and the ARISA profiles were analyzed using the GeneMapper Software v3.7.

## **OTU partitioning and pairwise comparison**

OTU partitioning was used to determine the number of OTUs that are specific for a certain condition and was performed on the ARISA dataset using Microsoft Excel and a custom R script [2]. Pairwise OTU comparison was based on a custom R script.

## **Volume calculation and 3D animation of cell aggregates**

The three dimensional imaging was done using confocal laser scanning microscopy (C-LSM) and aggregate volume was calculated with PHLIP [3]. For the 3D animation of the AOM consortium (Movie S2) we used *daim*e [4], the animation of the Methylococci aggregate (Movie S1) was calculated with IMARIS (v 7.1.1, Bitplane AG, Zürich, Switzerland). Both animations are based on C-LSM picture stacks that were processed and filtered (median filter, 2 pixels radius) with Image J v1.43 (<http://rsb.info.nih.gov/ij/index.html>) or deconvoluted with AutoQuant (v x2.2, Media Cybernetics, USA).

**Table S2: Oligonucleotide probes and primers used in this study**

| Oligonucleotides | Specificity                               | Target Gene | Target Position | FA conc. (% v/v) | Annealing (°C) | Nucleotide Sequence 5'-3'      | Reference          |
|------------------|-------------------------------------------|-------------|-----------------|------------------|----------------|--------------------------------|--------------------|
| A189F            | pmoA                                      | pmoA        | 189-206         | -                | 55             | GGN GAC TGG GAC TTC TGG        | [5]                |
| Arch20F          | most Archaea                              | 16S rRNA    | 20-38           | -                | 58             | TTC CGG TTG ATC CYG CCR G      | [6]                |
| GM3              | Bacteria                                  | 16S rRNA    | 8-23            | -                | 44             | AGA GTT TGA TCM TGG C          | [7]                |
| GM4              | Bacteria                                  | 16S rRNA    | 1492-1507       | -                | 44             | TAC CTT GTT ACG ACT T          | [7]                |
| ITSF FAM         | Universal                                 | 16S rRNA    | 1423-1443       | -                | 55             | GTC GTA ACA AGG TAG CCG TA     | Modified after [8] |
| ITSREub          | Bacteria                                  | 23S rRNA    | 23-38           | -                | 55             | GCC AAG GCA TCC ACC            | [8]                |
| MB661R           | pmoA                                      | pmoA        | 661-679         | -                | 55             | CCG GMG CAA CGT CYT TAC C      | [9]                |
| Uni1392R         | Universal                                 | 16S rRNA    | 1392-1406       | -                | 58             | ACG GGC GGT GTG TRC            | [10]               |
| ANME-1-350       | ANME-1                                    | 16S rRNA    | 350-367         | 40               | -              | AGT TTT CGC GCC TGA TGC        | [11]               |
| ANME-2a-647      | ANME-2a                                   | 16S rRNA    | 647-664         | 35               | -              | TCT TCC GGT CCC AAG CCT        | [12]               |
| ANME-2c-760      | ANME-2c                                   | 16S rRNA    | 760-777         | 50               | -              | CGC CCC CAG CTT TCG TCC        | [12]               |
| ANME-3-1249      | ANME-3                                    | 16S rRNA    | 1249-1266       | 30               | -              | TCG GAG TAG GGA CCC ATT        | [13]               |
| ANME-3-1249H3    | Helper                                    | 16S rRNA    | 1249-1266       | 30               | -              | GTC CCA ATC ATT GTA GCC GGC    | [14]               |
| ANME-3-1249H5    | Helper                                    | 16S rRNA    | 1249-1266       | 30               | -              | TTA TGA GAT TAC CAT CTC CTT    | [14]               |
| Arch915          | most Archaea                              | 16S rRNA    | 915-934         | 35               | -              | GTG CTC CCC CGC CAA TTC CT     | [15]               |
| BWARM-845        | Methanotrophic endosymbiont B. sp.        | 16S rRNA    | 845-862         | 30               | -              | GCT CCG CCA CTA AGC CTA        | [16]               |
| DSS658           | <i>Desulfosarcina/ Desulfococcus</i>      | 16S rRNA    | 658-675         | 50               | -              | TCC ACT TCC CTC TCC CAT        | [17]               |
| EiMS932          | ANME-2                                    | 16S rRNA    | 932-949         | 50               | -              | AGC TCC ACC CGT TGT AGT        | [11]               |
| EPSI682          | <i>Epsilonproteobacteria</i>              | 16S rRNA    | 682-700         | 20               | -              | CGG ATT TTA CCC CTA CAC M      | [18]               |
| Eub338-I         | most Bacteria                             | 16S rRNA    | 338-355         | 35               | -              | GCT GCC TCC CGT AGG AGT        | [19]               |
| Eub338-II        | most Planctomycetales                     | 16S rRNA    | 338-355         | 35               | -              | GCA GCC ACC CGT AGG TGT        | [20]               |
| Eub338-III       | most Verrucomicrobiales                   | 16S rRNA    | 338-355         | 35               | -              | GCT GCC ACC CGT AGG TGT        | [20]               |
| LEN338 *         | <i>Lentisphaerae</i>                      | 16S rRNA    | 338-355         | 35               | -              | GCA GCC TCC CGC AGG AGT        | This study         |
| Gam42a           | <i>Gammaproteobacteria</i>                | 23S rRNA    | 1027-1043       | 35               | -              | GCC TTC CCA CAT CGT TT         | [21]               |
| c-Gam42a         | Competitor                                | 23S rRNA    | 1027-1043       | 35               | -              | GCC TTC CCA CTT CGT TT         | [21]               |
| Gam660           | Potential sulfur-oxidizing Bacteria       | 16S rRNA    | 660-674         | 35               | -              | TCC ACT TCC CTC TAC            | [22]               |
| Met-I-444        | HMMV-type-I-Methanotrophs                 | 16S rRNA    | 444-461         | 60               | -              | CCT GCC TGT TTT CCT CCC        | [13]               |
| MPH732           | <i>Methylophaga</i>                       | 16S rRNA    | 732-749         | 40               | -              | GTA ATG GCC CAG TGA GTC        | [13]               |
| MS1414           | <i>Methanosarcina /-coccoides /-lobus</i> | 16S rRNA    | 1414-1434       | 50               | -              | CTC ACC CAT ACC TCA CTC GGG    | [23]               |
| hMS1395          | MS1414-helper                             | 16S rRNA    | 1395-1412       | 50               | -              | GGT TTG ACG GGC GGT GTG        | [24]               |
| MTC-850          | <i>Methylococcales</i> clade MMG1/MMG2    | 16S rRNA    | 850-867         | 20               | -              | ACG TTA GCT CCG CCA CTA        | This study         |
| MTMC701          | most <i>Methylococcales</i>               | 16S rRNA    | 701-718         | 40               | -              | GTG TTC CTT CAG ATC TCT        | [11]               |
| c1-MTMC701       | Competitor                                | 16S rRNA    | 701-718         | 40               | -              | GTA TTC CTT CAG ATC TCT        | This study         |
| c2-MTMC701       | Competitor                                | 16S rRNA    | 701-718         | 40               | -              | GTG TTC CTC CAG ATC TCT        | This study         |
| NON338           | Nonsense probe                            | -           | -               | 35               | -              | ACT CCT ACG GGA GGC AGC        | [25]               |
| SEEP1a-473       | SEEP-SRB-1a                               | 16S rRNA    | 473-495         | 30               | -              | TTC AGT GAT ACC GTC AGT ATC CC | [26]               |

\* the LEN338 probe was combined with the general bacterial probe mix Eub338\_III for a more complete detection of bacterial clades in marine sediments

## References

1. Böer SI, Hedtkamp SIC, van Beusekom JEE, Fuhrman JA, Boetius A, et al. (2009) Time- and sediment depth-related variations in bacterial diversity and community structure in subtidal sands. *ISME J* 3: 780-791.
2. Ramette A (2009) Quantitative Community Fingerprinting Methods for Estimating the Abundance of Operational Taxonomic Units in Natural Microbial Communities. *Appl Environ Microbiol* 75: 2495-2505.
3. Mueller L, de Brouwer J, Almeida J, Stal L, Xavier J (2006) Analysis of a marine phototrophic biofilm by confocal laser scanning microscopy using the new image quantification software PHLIP. *BMC Ecology* 6: 1.
4. Daims H, Lückner S, Wagner M (2006) daime, a novel image analysis program for microbial ecology and biofilm research. *Environmental Microbiology* 8: 200-213.
5. Holmes AJ, Costello A, Lidstrom ME, Murrell JC (1995) Evidence that participate methane monooxygenase and ammonia monooxygenase may be evolutionarily related. *FEMS Microbiol Lett* 132: 203-208.
6. Massana R, Murray AE, Preston CM, DeLong EF (1997) Vertical distribution and phylogenetic characterization of marine planktonic Archaea in the Santa Barbara Channel. *Appl Environ Microbiol* 63: 50-56.
7. Muyzer G, de Waal EC, Uitterlinden AG (1993) Profiling of complex microbial populations by denaturing gradient gel electrophoresis analysis of polymerase chain reaction-amplified genes coding for 16S rRNA. *Appl Environ Microbiol* 59: 695-700.
8. Cardinale M, Brusetti L, Quatrini P, Borin S, Puglia AM, et al. (2004) Comparison of Different Primer Sets for Use in Automated Ribosomal Intergenic Spacer Analysis of Complex Bacterial Communities. *Appl Environ Microbiol* 70: 6147-6156.
9. Costello AM, Lidstrom ME (1999) Molecular Characterization of Functional and Phylogenetic Genes from Natural Populations of Methanotrophs in Lake Sediments. *Appl Environ Microbiol* 65: 5066-5074.
10. Lane DJ, Pace B, Olsen GJ, Stahl DA, Sogin ML, et al. (1985) Rapid determination of 16S ribosomal RNA sequences for phylogenetic analyses. *PNAS* 82: 6955-6959.
11. Boetius A, Ravensschlag K, Schubert CJ, Rickert D, Widdel F, et al. (2000) A marine microbial consortium apparently mediating anaerobic oxidation of methane. *Nature* 407: 623-626.
12. Knittel K, Lösekann T, Boetius A, Kort R, Amann R (2005) Diversity and Distribution of Methanotrophic Archaea at Cold Seeps. *Appl Environ Microbiol* 71: 467-479.
13. Niemann H, Lösekann T, de Beer D, Elvert M, Nadalig T, et al. (2006) Novel microbial communities of the Haakon Mosby mud volcano and their role as a methane sink. *Nature* 443: 854-858.
14. Lösekann T, Knittel K, Nadalig T, Fuchs B, Niemann H, et al. (2007) Diversity and Abundance of Aerobic and Anaerobic Methane Oxidizers at the Haakon Mosby Mud Volcano, Barents Sea. *Appl Environ Microbiol* 73: 3348-3362.
15. Stahl DA, Amann R (1991) Nucleic acid techniques in bacterial systematics. In: Stackebrandt E, Goodfellow M, editors. Chichester, England: John Wiley & Sons Ltd. pp. 205-248.
16. Duperron S, Bergin C, Zielinski F, Blazejak A, Pernthaler A, et al. (2006) A dual symbiosis shared by two mussel species, *Bathymodiolus azoricus* and *Bathymodiolus puteoserpentis* (Bivalvia: Mytilidae), from hydrothermal vents along the northern Mid-Atlantic Ridge. *Environ Microbiol* 8: 1441-1447.

17. Manz W, Eisenbrecher M, Neu TR, Szewzyk U (1998) Abundance and spatial organization of Gram-negative sulfate-reducing bacteria in activated sludge investigated by in situ probing with specific 16S rRNA targeted oligonucleotides. *FEMS Microbiol Ecol* 25: 43-61.
18. Moussard H, Corre E, Cambon-Bonavita M-A, Fouquet Y, Jeanthon C (2006) Novel uncultured Epsilonproteobacteria dominate a filamentous sulphur mat from the 13°N hydrothermal vent field, East Pacific Rise. *FEMS Microbiol Ecol* 58: 449-463.
19. Amann RI, Binder BJ, Olson RJ, Chisholm SW, Devereux R, et al. (1990) Combination of 16S rRNA-targeted oligonucleotide probes with flow cytometry for analyzing mixed microbial populations. *Appl Environ Microbiol* 56: 1919-1925.
20. Daims H, Brühl A, Amann R, Schleifer KH, Wagner M (1999) The domain-specific probe EUB338 is insufficient for the detection of all Bacteria: development and evaluation of a more comprehensive probe set. *Syst Appl Microbiol* 22: 434-444.
21. Manz W, Amann R, Ludwig W, Wagner M, Schleifer K-H (1992) Phylogenetic Oligodeoxynucleotide Probes for the Major Subclasses of Proteobacteria: Problems and Solutions. *Syst Appl Microbiol* 15: 593-600.
22. Ravensschlag K, Sahm K, Amann R (2001) Quantitative Molecular Analysis of the Microbial Community in Marine Arctic Sediments (Svalbard). *Appl Environ Microbiol* 67: 387-395.
23. Raskin L, Stromley JM, Rittmann BE, Stahl DA (1994) Group-specific 16S rRNA hybridization probes to describe natural communities of methanogens. *Appl Environ Microbiol* 60: 1232-1240.
24. Crocetti G, Murto M, Björnsson L (2006) An update and optimisation of oligonucleotide probes targeting methanogenic Archaea for use in fluorescence in situ hybridisation (FISH). *J Microbiol Meth* 65: 194-201.
25. Wallner G, Amann R, Beisker W (1993) Optimizing fluorescent in situ hybridization with rRNA-targeted oligonucleotide probes for flow cytometric identification of microorganisms. *Cytometry* 14: 136-143.
26. Schreiber L, Holler T, Knittel K, Meyerdierks A, Amann R (2010) Identification of the dominant sulfate-reducing bacterial partner of anaerobic methanotrophs of the ANME-2 clade. *Environ Microbiol* 12: 2327-2340.
